# Supplementary material for: Polymorphisms and Gene-Gene Interaction in AGER/IL6 Pathway Might Be Associated with Diabetic Ischemic Heart Disease
Source: MDPI journal article supplement (doi:10.3390/jpm12030392), 2022-03-04
Supplement: s1 [file s1]

**Table S1** General information of the candidate SNPs and their primer sequences

| Gene        | Rs number | Relevant trait/<br>Population/<br>Reference                                | Location        | Minor/Major<br>allele | MAF   | Primer<br>name | Primer sequence                        |
|-------------|-----------|----------------------------------------------------------------------------|-----------------|-----------------------|-------|----------------|----------------------------------------|
| <i>AGER</i> | rs1035798 | Ischemic stroke<br>Swedish [1]                                             | intron          | A/G                   | 0.164 | Forward        | 5'-ACGTTGGATGAAAAAGCCTTCAACCCCAGC-3'   |
|             |           |                                                                            |                 |                       |       | Reverse        | 5'-ACGTTGGATGCTGAAGGAGGAAAAATCCAG-3'   |
|             |           |                                                                            |                 |                       |       | UEP-SEQ        | 5'-GGTGGTGAAGGTTCTCAAACCTCTGT-3'       |
|             | rs1800624 | Ulcerative colitis<br>Chinese [2]                                          | promoter        | T/A                   | 0.166 | Forward        | 5'-ACGTTGGATGGCCAGACTGTTGTCTGCAAG-3'   |
|             |           |                                                                            |                 |                       |       | Reverse        | 5'-ACGTTGGATGAAAACATGAGAAACCCCAG-3'    |
|             |           |                                                                            |                 |                       |       | UEP-SEQ        | 5'-GCATTGCCTTCATGATGCAGGCCCAA-3'       |
|             | rs1800625 | Ulcerative colitis<br>Chinese [2]                                          | promoter        | G/A                   | 0.129 | Forward        | 5'-ACGTTGGATGGCCAGACTGTTGTCTGCAAG-3'   |
|             |           |                                                                            |                 |                       |       | Reverse        | 5'-ACGTTGGATGAAAACATGAGAAACCCCAG-3'    |
|             |           |                                                                            |                 |                       |       | UEP-SEQ        | 5'-GAACAAAAATGATTTTCTTTCACGAAG-3'      |
|             | rs184003  | Asthma, diabetes and its<br>complications<br>Chinese [3,4]                 | intron          | G/T                   | 0.152 | Forward        | 5'-ACGTTGGATGTTTCCCTCGTTAGCCCTCTG-3'   |
|             |           |                                                                            |                 |                       |       | Reverse        | 5'-ACGTTGGATGCACTGGATGAAGGATGTGAG-3'   |
|             |           |                                                                            |                 |                       |       | UEP-SEQ        | 5'-GTAGGGTGAACCATAACTA-3'              |
|             | rs2070600 | Diabetic nephropathy,<br>cardiovascular disease<br>Finnish, American [5,6] | Exon-missense   | T/C                   | 0.105 | Forward        | 5'-ACGTTGGATGCCATTCCCTGTTTCATTGCCTG-3' |
|             |           |                                                                            |                 |                       |       | Reverse        | 5'-ACGTTGGATGACAGTGTGGCTCGTGTCCCTT-3'  |
|             |           |                                                                            |                 |                       |       | UEP-SEQ        | 5'-GCTTGCTCGTGTCCCTTCCCAAC-3'          |
| <i>IL6R</i> | rs2228144 | Ischemic stroke<br>Korean [7]                                              | Exon-synonymous | A/G                   | 0.096 | Forward        | 5'-ACGTTGGATGAAGTGTCTTCTCCCTCCTCC-3'   |
|             |           |                                                                            |                 |                       |       | Reverse        | 5'-ACGTTGGATGAACAGTGGCATTGTCTTCCG-3'   |
|             |           |                                                                            |                 |                       |       | UEP-SEQ        | 5'-AGGGTCAGCACGCCTCT-3'                |
|             | rs4072391 | Lung cancer                                                                | 3' UTR          | T/C                   | 0.398 | Forward        | 5'-ACGTTGGATGCCACCCTCTCAAGAGAAAAC-3'   |

|           |                        |                        |                               |     | / miRNA binding site |                        |                                         |
|-----------|------------------------|------------------------|-------------------------------|-----|----------------------|------------------------|-----------------------------------------|
| rs4129267 | Chinese [8]            | Cardiovascular disease | intron                        | T/C | 0.401                | Reverse                | 5'-ACGTTGGATGAACCTGGGTAAGTACTAGGGAAG-3' |
|           | UEP-SEQ                |                        |                               |     |                      | 5'-GAGCCTGGCAAGAATG-3' |                                         |
|           | American [9]           |                        |                               |     |                      | Forward                | 5'-ACGTTGGATGGGATCTCAGATGAGGTGATG-3'    |
| rs4537545 | Inflammation           | Inflammation           | intron                        | T/C | 0.498                | Reverse                | 5'-ACGTTGGATGCAGTCTAGAGGTGGAATGG-3'     |
|           | French [10]            |                        |                               |     |                      | UEP-SEQ                | 5'-CGGAGTGGGGTCAATTCT-3'                |
|           |                        |                        |                               |     |                      | Forward                | 5'-ACGTTGGATGAGTAAGGACTAGCAAGGAGG-3'    |
| rs4845625 | Dyslipidemia           | Dyslipidemia           | intron                        | T/C | 0.14                 | Reverse                | 5'-ACGTTGGATGTTTCCCCCTTACTGGTGATG-3'    |
|           | Japanese [11]          |                        |                               |     |                      | UEP-SEQ                | 5'-GGAAACCCTCCCTGA-3'                   |
|           |                        |                        |                               |     |                      | Forward                | 5'-ACGTTGGATGGAAGCAGCTGTTGTCCTTAC-3'    |
| rs7514452 | Obesity                | Obesity                | 3' UTR/<br>miRNA binding site | C/T | 0.096                | Reverse                | 5'-ACGTTGGATGTCTGTCCAAGGTGACATAGC-3'    |
|           | Indian [12]            |                        |                               |     |                      | UEP-SEQ                | 5'-GAACCAGCATTCCAGTCA-3'                |
|           |                        |                        |                               |     |                      | Forward                | 5'-ACGTTGGATGGGTTTCAAACCTCCCTTTCC-3'    |
| rs7529229 | Coronary heart disease | Coronary heart disease | intron                        | C/T | 0.397                | Reverse                | 5'-ACGTTGGATGGTGTGAGTGTCCAAAGAGTC-3'    |
|           | Chinese [13]           |                        |                               |     |                      | UEP-SEQ                | 5'-GGGCCCAAGTTCACCTCTA-3'               |
|           |                        |                        |                               |     |                      | Forward                | 5'-ACGTTGGATGTTCCCTTTCACAGAGGTTTG-3'    |
|           |                        |                        |                               |     |                      | Reverse                | 5'-ACGTTGGATGCTGATGCCAGACCGAATTG-3'     |
|           |                        |                        |                               |     |                      | UEP-SEQ                | 5'-GAACTGTGGTCGTGGTGAGTTACC-3'          |

MAF minor allele frequency, SNP single nucleotide polymorphism;

#### Reference:

- [1] Olsson, S.; Jood, K. Genetic variation in the receptor for advanced glycation end-products (RAGE) gene and ischaemic stroke. *European Journal of Neurology* **2013**, *20*, 991-3.
- [2] Wang, Z.T.; Wang, L.Y.; Wang, L.; Cheng, S.; Fan, R.; Zhou, J.; Zhong, J. Association between RAGE gene polymorphisms and ulcerative colitis susceptibility: a case-control study in a Chinese Han population. *Genetics & Molecular Research Gmr* **2015**, *14*, 19242.

- [3] Kang, P.; Tian, C.; Jia, C. Association of RAGE gene polymorphisms with type 2 diabetes mellitus, diabetic retinopathy and diabetic nephropathy. *Gene* **2012**, 500, 1-9.
- [4] Niu, H.; Niu, W.; Yu, T.; Dong, F.; Huang, K.; Duan, R.; Qumu, S.; Lu, M.; Li, Y.; Yang, T.; Wang, C. Association of RAGE gene multiple variants with the risk for COPD and asthma in northern Han Chinese. *Aging (Albany NY)* **2019**, 11, 3220-3237.
- [5] Wadén, J.M.; Dahlström, E.H.; Elonen, N.; Thorn, L.M.; Wadén, J.; Sandholm, N.; Forsblom, C.; Groop, P.H.; FinnDiane Study Group. Soluble receptor for AGE in diabetic nephropathy and its progression in Finnish individuals with type 1 diabetes. *Diabetologia* **2019**, 62, 1268-1274.
- [6] Maruthur, N.M.; Li, M.; Halushka, M.K.; Astor, B.C.; Pankow, J.S.; Boerwinkle, E.; Coresh, J.; Selvin, E.; Kao, W.H. Genetics of Plasma Soluble Receptor for Advanced Glycation End-Products and Cardiovascular Outcomes in a Community-based Population: Results from the Atherosclerosis Risk in Communities Study. *PLoS One* **2015**, 10, e0128452.
- [7] Kim, D.H.; Yoo, S.D.; Chon, J.; Yun, D.H.; Kim, H.S.; Park, H.J.; Kim, S.K.; Chung, J.H.; Kang, J.K.; Lee, S.A. Interleukin-6 Receptor Polymorphisms Contribute to the Neurological Status of Korean Patients with Ischemic Stroke. *J Korean Med Sci* **2016**, 31, 430-4.
- [8] He, F.; Yang, R.; Li, X.Y.; Ye, C.; He, B.C.; Lin, T.; Xu, X.Q.; Zheng, L.L.; Luo, W.T.; Cai, L. Single nucleotide polymorphisms of the NF- $\kappa$ B and STAT3 signaling pathway genes predict lung cancer prognosis in a Chinese Han population. *Cancer Genet* **2015**, 208, 310-8.
- [9] Key, K.V.; Mudd-Martin, G.; Moser, D.K.; Rayens, M.K.; Morford, L.A. Inflammatory Genotype Moderates the Association Between Anxiety and Systemic Inflammation in Adults at Risk for Cardiovascular Disease. *J Cardiovasc Nurs* **2022**, 37, 64-72.
- [10] Arguinano, A.A.; Naderi, E.; Ndiaye, N.C.; Stathopoulou, M.; Dadé, S.; Alizadeh, B.; Visvikis-Siest, S. IL6R haplotype rs4845625\*T/rs4537545\*C is a risk factor for simultaneously high CRP, LDL and ApoB levels. *Genes Immun* **2017**, 18, 163-169.
- [11] Abe, S.; Tokoro, F.; Matsuoka, R.; Arai, M.; Noda, T.; Watanabe, S.; Horibe, H.; Fujimaki, T.; Oguri, M.; Kato, K.; Minatoguchi, S.; Yamada, Y. Association of genetic variants with dyslipidemia. *Mol Med Rep* **2015**, 12, 5429-36.
- [12] Tabassum, R.; Mahendran, Y.; Dwivedi, O.P.; Chauhan, G.; Ghosh, S.; Marwaha, R.K.; Tandon, N.; Bharadwaj, D. Common variants of IL6, LEPR, and PBEF1 are associated with obesity in Indian children. *Diabetes* **2012**, 61, 626-31.
- [13] He, F.; Teng, X.; Gu, H.; Liu, H.; Zhou, Z.; Zhao, Y.; Hu, S.; Zheng, Z. Interleukin-6 receptor rs7529229 T/C polymorphism is associated with left main coronary artery disease phenotype in a Chinese population. *Int J Mol Sci* **2014**, 15, 5623-33.

**Table S2** Recommendation cutoffs and proportions according to cutoffs in healthy people and ischemic heart disease patients with diabetes

|       |                         | Controls <sup>1</sup> | T2DM+IHD <sup>2</sup>     | P value  |
|-------|-------------------------|-----------------------|---------------------------|----------|
| SBP   | Ideal cutoffs (mmHg)    | ≤140                  | ≤130                      |          |
|       | Ideal proportion, n (%) | 509(57.8)             | 73(36.3)                  | <0.001** |
| DBP   | Ideal cutoffs (mmHg)    | ≤130                  | ≤140                      |          |
|       | Ideal proportion, n (%) | 749(85.2)             | 58(28.9)                  | <0.001** |
| TC    | Ideal cutoffs (mmol/L)  | <5.2                  | <4.5                      |          |
|       | Ideal proportion, n (%) | 471 (53.4)            | 81 (44.4)                 | 0.022*   |
| HDL-C | Ideal cutoffs (mmol/L)  | >1.0                  | >1.0 (male); >1.3(female) |          |
|       | Ideal proportion, n (%) | 772 (87.5)            | 124 (63.3)                | <0.001** |
| LDL-C | Ideal cutoffs (mmol/L)  | <3.4                  | <1.8                      |          |
|       | Ideal proportion, n (%) | 596 (67.6)            | 24 (12.2)                 | <0.001** |
| TG    | Ideal cutoffs (mmol/L)  | <1.7                  | <1.7                      |          |
|       | Ideal proportion, n (%) | 575 (65.2)            | 55 (28.1)                 | <0.001** |

T2DM type 2 diabetes, IHD ischemic heart disease, SBP systolic blood pressure, DBP diastolic blood pressure, TG triglyceride, TC total cholesterol, LDL-C low density lipoprotein cholesterol, HDL-C high density lipoprotein cholesterol.

<sup>1</sup> Ideal cutoffs in controls (healthy people) were from “The 2016 Chinese guidelines for the management of dyslipidemia in adults”.

<sup>2</sup> Ideal cutoffs in cases (diabetic ischemic heart disease patients) were from “The 2017 Guidelines for the prevention and treatment of type 2 diabetes in China”.

\*\*P<0.01, \* P<0.05.

**Table S3** Associations of gene polymorphisms with the risk of diabetic cardiovascular disease

|           | Genotype  | Crude OR <sup>1</sup> (95%CI) | Crude P value | Adjusted OR $\alpha$ (95%CI) | Adjusted P value |
|-----------|-----------|-------------------------------|---------------|------------------------------|------------------|
| rs1035798 | GG        | Ref                           | Ref           | Ref                          | Ref              |
|           | AG        | 1.156 (0.817, 1.637)          | 0.413         | 1.240 (0.817, 1.883)         | 0.313            |
|           | AA        | 0.887 (0.360, 2.183)          | 0.794         | 0.790 (0.225, 2.449)         | 0.683            |
|           | additive  | 1.069 (0.805, 1.420)          | 0.645         | 1.096 (0.777, 1.546)         | 0.6              |
|           | dominant  | 1.124 (0.804, 1.570)          | 0.495         | 1.185 (0.791, 1.775)         | 0.411            |
|           | recessive | 0.852 (0.348, 2.086)          | 0.725         | 0.741 (0.241, 2.281)         | 0.602            |
| rs1800624 | AA        | Ref                           | Ref           | Ref                          | Ref              |
|           | AT        | 1.105 (0.776, 1.572)          | 0.58          | 1.206 (0.790, 1.841)         | 0.385            |
|           | TT        | 0.987 (0.446, 2.183)          | 0.974         | 0.949 (0.365, 2.467)         | 0.915            |
|           | additive  | 1.054 (0.799, 1.389)          | 0.711         | 1.095 (0.787, 1.524)         | 0.589            |
|           | dominant  | 1.088 (0.778, 1.521)          | 0.622         | 1.168 (0.780, 1.747)         | 0.451            |
|           | recessive | 0.961 (0.437, 2.114)          | 0.921         | 0.900 (0.349, 2.321)         | 0.828            |
| rs1800625 | AA        | Ref                           | Ref           | Ref                          | Ref              |
|           | AG        | 1.071 (0.746, 1.538)          | 0.709         | 1.356 (0.877, 2.097)         | 0.171            |
|           | GG        | 2.324 (0.672, 8.041)          | 0.183         | 2.373 (0.527, 10.677)        | 0.26             |
|           | additive  | 1.157 (0.835, 1.601)          | 0.381         | 1.396 (0.945, 2.062)         | 0.094            |
|           | dominant  | 1.117 (0.785, 1.589)          | 0.539         | 1.399 (0.914, 2.140)         | 0.122            |
|           | recessive | 2.286 (0.663, 7.885)          | 0.191         | 2.204 (0.493, 9.851)         | 0.301            |
| rs2228144 | GG        | Ref                           | Ref           | Ref                          | Ref              |
|           | AG        | 1.301 (0.889), 1.904          | 0.175         | 1.118 (0.687, 1.818)         | 0.654            |
|           | AA        | 1.679 (0.520, 5.425)          | 0.386         | 1.534 (0.387, 6.090)         | 0.543            |
|           | additive  | 1.300 (0.935, 1.806)          | 0.118         | 1.154 (0.765, 1.742)         | 0.495            |
|           | dominant  | 1.326 (0.917, 1.917)          | 0.134         | 1.149 (0.720, 1.834)         | 0.559            |
|           | recessive | 1.594 (0.495, 5.135)          | 0.435         | 1.504 (0.380, 5.951)         | 0.561            |
| rs4072391 | CC        | Ref                           | Ref           | Ref                          | Ref              |
|           | CT        | 1.149 (0.777, 1.698)          | 0.487         | 1.177 (0.728, 1.903)         | 0.506            |
|           | TT        | 0.675 (0.081, 5.644)          | 0.717         | -                            | -                |
|           | additive  | 1.300 (0.935, 1.806)          | 0.118         | 1.048 (0.666, 1.650)         | 0.838            |
|           | dominant  | 1.129 (0.767, 1.662)          | 0.537         | 1.118 (0.693, 1.802)         | 0.647            |
|           | recessive | 0.658 (0.079, 5.493)          | 0.658         | -                            | -                |
| rs4129267 | CC        | Ref                           | Ref           | Ref                          | Ref              |
|           | CT        | 1.327 (0.937, 1.877)          | 0.111         | 1.323 (0.865, 2.023)         | 0.197            |
|           | TT        | 1.430 (0.898, 2.279)          | 0.132         | 1.575 (0.891, 2.783)         | 0.118            |
|           | additive  | 1.217 (0.973, 1.521)          | 0.085         | 1.266 (0.961, 1.667)         | 0.094            |
|           | dominant  | 1.351 (0.970, 1.880)          | 0.075         | 1.378 (0.919, 2.067)         | 0.121            |
|           | recessive | 1.208 (0.799, 1.825)          | 0.371         | 1.329 (0.803, 2.199)         | 0.268            |
| rs4537545 | CC        | Ref                           | Ref           | Ref                          | Ref              |
|           | CT        | 1.395 (0.984, 1.978)          | 0.062         | 1.485 (0.966, 2.283)         | 0.071            |
|           | TT        | 1.386 (0.866, 2.220)          | 0.174         | 1.585 (0.887, 2.833)         | 0.12             |
|           | additive  | 1.217 (0.973, 1.521)          | 0.085         | 1.292 (0.980, 1.705)         | 0.07             |

|           |           |                      |       |                      |       |
|-----------|-----------|----------------------|-------|----------------------|-------|
|           | dominant  | 1.393 (0.998, 1.944) | 0.051 | 1.507 (0.998, 2.276) | 0.051 |
|           | recessive | 1.132 (0.747, 1.716) | 0.558 | 1.239 (0.745, 2.060) | 0.409 |
| rs7514452 | TT        | Ref                  | Ref   | Ref                  | Ref   |
|           | CT        | 1.113 (0.751, 1.650) | 0.594 | 1.136 (0.700, 1.846) | 0.605 |
|           | CC        | 0.671 (0.080, 5.610) | 0.712 | -                    | -     |
|           | additive  | 1.069 (0.739, 1.544) | 0.724 | 1.015 (0.642, 1.605) | 0.95  |
|           | dominant  | 1.095 (0.742, 1.616) | 0.647 | 1.079 (0.666, 1.748) | 0.757 |
|           | recessive | 0.658 (0.079, 5.493) | 0.699 | -                    | -     |
| rs7529229 | TT        | Ref                  | Ref   | Ref                  | Ref   |
|           | CT        | 1.289 (0.912, 1.822) | 0.151 | 1.301 (0.851, 1.989) | 0.225 |
|           | CC        | 1.403 (0.881, 2.234) | 0.153 | 1.557 (0.881, 2.752) | 0.127 |
|           | additive  | 1.069 (0.739, 1.544) | 0.724 | 1.256 (0.953, 1.656) | 0.105 |
|           | dominant  | 1.315 (0.946, 1.829) | 0.103 | 1.357 (0.905, 2.034) | 0.14  |
|           | recessive | 1.206 (0.798, 1.822) | 0.375 | 1.327 (0.802, 2.195) | 0.271 |

<sup>1</sup> No variables were adjusted in logistic regression model  $\propto$  Dyslipidemia, hypertension, smoking, and drinking were adjusted in the logistic regression model. Adjusted p-values shown in the table are adjusted only by covariates.

**Table S4** Sensitivity analysis for the association between AGER and IL6R gene polymorphisms and diabetic ischemic heart disease

|             | rs4845625            |              | rs184003             |              | Interaction          |              |
|-------------|----------------------|--------------|----------------------|--------------|----------------------|--------------|
|             | OR (95%CI)           | <i>P</i>     | OR (95%CI)           | <i>P</i>     | OR (95%CI)           | <i>P</i>     |
| Crude model | 0.707 (0.563, 0.888) | <b>0.003</b> | 1.491 (1.125, 1.976) | <b>0.005</b> | 1.381 (1.126, 1.693) | <b>0.002</b> |
| Model 1     | 0.653 (0.498, 0.858) | <b>0.002</b> | 1.679 (1.200, 2.349) | <b>0.002</b> | 1.166 (0.893, 1.521) | 0.259        |
| Model 2     | 0.729 (0.579, 0.918) | <b>0.007</b> | 1.425 (1.070, 1.899) | <b>0.015</b> | 1.360 (1.104, 1.676) | <b>0.004</b> |
| Model 3     | 0.713 (0.566, 0.897) | <b>0.004</b> | 1.424 (1.069, 1.896) | <b>0.016</b> | 1.124 (0.897, 1.408) | <b>0.311</b> |
| Model 4     | 0.714 (0.550, 0.927) | <b>0.011</b> | 1.343 (0.963, 1.873) | 0.082        | 1.291 (1.007, 1.656) | <b>0.044</b> |
| Model 5     | 0.708 (0.544, 0.920) | <b>0.010</b> | 1.309 (0.935, 1.834) | 0.117        | 1.294 (1.005, 1.667) | <b>0.045</b> |

Model 1, adjust for fasting plasma glucose; model 2, adjust for hyperlipidaemia; model 3, adjust for hypertension; model 4, adjust for smoking behavior; model5, adjust for alcohol drinking behavior.

**Table S5** Subgroup analysis for the association between candidate SNPs and diabetic IHD

| Stratification           |                       | Subgroup 1           |              | Subgroup 2           |              |
|--------------------------|-----------------------|----------------------|--------------|----------------------|--------------|
| factors                  |                       | OR (95%CI)           | P            | OR (95%CI)           | P            |
| FPG <sup>1</sup>         | rs4845625             | 1.170 (0.182, 7.505) | 0.869        | 0.496 (0.288, 0.856) | <b>0.012</b> |
|                          | rs184003              | 1.796 (0.371, 8.694) | 0.496        | 1.095 (0.508, 2.360) | 0.817        |
|                          | Gene-gene interaction | 2.170 (0.654, 7.197) | 0.205        | 0.713 (0.387, 1.313) | 0.278        |
| ICVD scores <sup>2</sup> | rs4845625             | 0.389 (0.197, 0.768) | <b>0.007</b> | 0.776 (0.406, 1.483) | 0.443        |
|                          | rs184003              | 1.904 (0.839, 4.321) | 0.124        | 0.570 (0.225, 1.445) | 0.236        |
|                          | Gene-gene interaction | 1.071 (0.562, 2.041) | 0.834        | 0.629 (0.300, 1.316) | 0.218        |

<sup>1</sup> When stratified by FPG, subgroup 1: FPG ≤ 6.1 mmol/L, subgroup 2: FPG > 6.1 mmol/L. All models were adjusted for hyperlipidaemia, hypertension, smoking and alcohol drinking behavior.

<sup>2</sup> When stratified by ICVD scores, subgroups were defined according to the median of ICVD risk scores (9 points), subgroup 1: ICVD risk scores ≤ 8, subgroup 2: ICVD risk scores > 9.

**Table S6** The association between candidate SNPs and FPG or ICVD risk scores

|                    |           | Crude                |       | Adjust model <sup>3</sup> |       |
|--------------------|-----------|----------------------|-------|---------------------------|-------|
|                    |           | OR (95%CI)           | P     | OR (95%CI)                | P     |
| FPG <sup>1</sup>   | rs4845625 | 0.892 (0.666, 1.195) | 0.444 | 0.892 (0.652, 1.219)      | 0.472 |
|                    | rs184003  | 0.953 (0.640, 1.417) | 0.810 | 1.057 (0.681, 1.641)      | 0.805 |
| Score <sup>2</sup> | rs4845625 | 0.879 (0.646, 1.196) | 0.411 | 0.895 (0.634, 1.263)      | 0.527 |
|                    | rs184003  | 1.135 (0.741, 1.738) | 0.560 | 1.252 (0.769, 2.037)      | 0.366 |

<sup>1</sup> FPG > 6.1 mmol/L was assigned to 1, and FPG ≤ 6.1 mmol/L was assigned to 0.

<sup>2</sup> ICVD risk score > 9 was assigned to 1, and ICVD risk score ≤ 9 was assigned to 0.

<sup>3</sup> Hyperlipidaemia, hypertension, smoking and alcohol drinking behavior were adjusted.

**Table S7** The association of traits and haplotypes constituted by rs184003-rs1035798-rs2070600-rs1800624

| Haplotypes     | C-A-C-T |          | C-G-T-A |              | A-G-C-A |          | C-G-C-A |              |
|----------------|---------|----------|---------|--------------|---------|----------|---------|--------------|
|                | $\beta$ | <i>P</i> | $\beta$ | <i>P</i>     | $\beta$ | <i>P</i> | $\beta$ | <i>P</i>     |
| TG (mmol/L)    | -0.047  | 0.481    | -0.039  | 0.532        | 0.104   | 0.140    | -0.005  | 0.919        |
| TC (mmol/L)    | -0.003  | 0.965    | -0.026  | 0.663        | -0.033  | 0.627    | 0.038   | 0.443        |
| HDL-C (mmol/L) | 0.039   | 0.089    | 0.005   | 0.809        | -0.026  | 0.283    | -0.011  | 0.530        |
| LDL-C (mmol/L) | -0.016  | 0.743    | -0.013  | 0.774        | -0.016  | 0.765    | 0.026   | 0.500        |
| SBP (mmHg)     | 1.082   | 0.272    | 0.338   | 0.709        | -1.891  | 0.067    | 0.095   | 0.898        |
| DBP (mmHg)     | -0.161  | 0.789    | 0.148   | 0.788        | -0.333  | 0.596    | 0.221   | 0.626        |
| FPG (mmol/L)   | 0.122   | 0.663    | -0.754  | <b>0.002</b> | -0.130  | 0.618    | 0.512   | <b>0.011</b> |
| AGEs (mmol/L)  | -1.253  | 0.441    | 0.369   | 0.803        | 2.911   | 0.081    | -0.971  | 0.423        |
| IL-6 (mmol/L)  | -6.808  | 0.075    | 3.867   | 0.267        | 2.527   | 0.522    | 0.386   | 0.893        |

*BP* systolic blood pressure, *DBP* diastolic blood pressure, *FPG* fasting plasma glucose, *TG* triglyceride, *TC* total cholesterol, *LDL-C* low density lipoprotein cholesterol, *HDL-C* high density lipoprotein cholesterol, *AGEs* advanced glycation end products, *IL-6* interleukin 6.

**Table S8** The association of traits and haplotypes constituted by rs7529229-rs4845625-rs4129267-rs7514452-rs4072391

| Haplotypes    | T-T-C-C-T |              | C-C-T-T-C |          | T-C-C-T-C |          | T-T-C-T-C |          |
|---------------|-----------|--------------|-----------|----------|-----------|----------|-----------|----------|
|               | $\beta$   | <i>P</i>     | $\beta$   | <i>P</i> | $\beta$   | <i>P</i> | $\beta$   | <i>P</i> |
| TG (mmol/L)   | -0.063    | 0.483        | 0.075     | 0.155    | 0.064     | 0.448    | -0.085    | 0.114    |
| TC (mmol/L)   | -0.182    | <b>0.034</b> | 0.055     | 0.281    | -0.124    | 0.127    | 0.054     | 0.294    |
| HDLC (mmol/L) | -0.042    | 0.167        | 0.007     | 0.708    | 0.010     | 0.734    | 0.000     | 0.992    |
| LDLC (mmol/L) | -0.102    | 0.128        | 0.024     | 0.548    | -0.115    | 0.067    | 0.057     | 0.150    |
| SBP (mmHg)    | 1.857     | 0.156        | -0.149    | 0.847    | -0.640    | 0.603    | -0.254    | 0.746    |
| DBP (mmHg)    | -0.548    | 0.492        | 0.469     | 0.318    | -0.590    | 0.431    | -0.054    | 0.910    |
| FPG (mmol/L)  | -0.239    | 0.492        | -0.072    | 0.730    | 0.027     | 0.907    | 0.278     | 0.357    |
| AGEs (mmol/L) | -0.079    | 0.970        | -1.459    | 0.236    | 0.608     | 0.643    | 2.424     | 0.211    |
| IL6 (mmol/L)  | -1.695    | 0.730        | 0.594     | 0.838    | 0.234     | 0.940    | -0.572    | 0.901    |

*SBP* systolic blood pressure, *DBP* diastolic blood pressure, *FPG* fasting plasma glucose, *TG* triglyceride, *TC* total cholesterol, *LDL-C* low density lipoprotein cholesterol, *HDL-C* high density lipoprotein cholesterol, *AGEs* advanced glycation end products, *IL-6* interleukin 6.

**Table S9** The function of *AGER* and *IL6R* polymorphisms

| Rs number | Location                   | Functional Allele | Function description                                                                                                                                                |
|-----------|----------------------------|-------------------|---------------------------------------------------------------------------------------------------------------------------------------------------------------------|
| rs1035798 | intron                     | T allele          | Nominally decrease AGEs level <sup>[1]</sup>                                                                                                                        |
| rs1800624 | promoter                   | A allele          | Higher expression of sRAGE, AGER <sup>[1]</sup>                                                                                                                     |
| rs1800625 | promoter                   | C allele          | Higher expression of sRAGE, esRAGE and AGEs <sup>[1]</sup>                                                                                                          |
| rs184003  | intron                     | T allele          | Higher expression of sRAGE <sup>[1]</sup>                                                                                                                           |
| rs2070600 | Exon-missense              | A allele          | Rs2070600 SNP is located in the ligand-binding V domain of AGER, induces an increase in RAGE affinity for ligand AGEs. Lower level of sRAGE and AGEs <sup>[1]</sup> |
| rs2228144 | Exon-synonymous            | -                 | Absolute or strong linkage disequilibrium to rs2228145 which is eQTL for sIL-6R <sup>[2]</sup>                                                                      |
| rs4072391 | 3' UTR/ miRNA binding site | T allele          | Associated with lower plasma IL-6 concentration <sup>[3]</sup>                                                                                                      |
| rs4129267 | intron                     | T allele          | Associated with higher plasma IL-6 concentration [4]                                                                                                                |
| rs4537545 | intron                     | T allele          | Accounts for 20% of the variance in sIL-6R, associated with higher circulating IL-6 levels [3,5]                                                                    |
| rs4845625 | intron                     | T allele          | Explain 55% IL-6 soluble receptor (LOD=8.8), associated with higher hsCRP and Complement C3 [6-8]                                                                   |
| rs7514452 | 3' UTR/miRNA binding site  | -                 | Downstream transcript variant, construct haplotypes associated with sIL-6R [9]                                                                                      |
| rs7529229 | intron                     | C allele          | Increased circulating interleukin-6 concentration [10]                                                                                                              |

*SNPs* single nucleotide polymorphisms, *AGEs* Advanced Glycation End Products, *sRAGE* soluble receptor of Advanced Glycation End Product, *AGER* Advanced Glycation End Product Receptor, *esRAGE* endogenous secretory receptor for advanced glycation end products, *eQTL* expression Quantitative Trait Loci, *sIL-6R* soluble Interleukin-6 Receptor, *IL-6* Interleukin 6, *hsCRP* hypersensitive C Reactive Protein.

## Reference:

- [1] Li, T.; Qin, W.; Liu, Y.; Li, S.; Qin, X.; Liu, Z. Effect of RAGE gene polymorphisms and circulating sRAGE levels on susceptibility to gastric cancer: a case-control study. *Cancer Cell Int* **2017**, *17*, 19.
- [2] Van Dongen, J.; Jansen, R.; Smit, D.; Hottenga, J.J.; Mbarek, H.; Willemsen, G.; Kluft, C.; AAGC Collaborators, Penninx, B.W.; Ferreira, M.A.; Boomsma, D.I.; de Geus, E.J. The contribution of the functional IL6R polymorphism rs2228145, eQTLs and other genome-wide SNPs to the heritability of plasma sIL-6R levels. *Behav Genet* **2014**, *44*, 368-82.
- [3] Walston, J.D.; Matteini, A.M.; Nievergelt, C.; Lange, L.A.; Fallin, D.M.; Barzilai, N.; Ziv, E.; Pawlikowska, L.; Kwok, P.; Cummings, S.R.; Kooperberg, C.; LaCroix, A.; Tracy, R.P.; Atzmon, G.; Lange, E.M.; Reiner, A.P. Inflammation and stress-related candidate genes, plasma interleukin-6 levels, and longevity in older adults. *Exp Gerontol* **2009**, *44*, 350-5.
- [4] Naitza, S.; Porcu, E.; Steri, M.; Taub, D.D.; Mulas, A.; Xiao, X.; Strait, J.; Dei, M.; Lai, S.; Busonero, F.; Maschio, A.; Usala, G.; Zoledziewska, M.; Sidore, C.; Zara, I.; Pitzalis, M.; Loi, A.; Virdis, F.; Piras, R.; Deidda, F.; Whalen, M.B.; Crisponi, L.; Concas, A.; Podda, C.; Uzzau, S.; Scheet, P.; Longo, D.L.; Lakatta, E.; Abecasis, G.R.; Cao, A.; Schlessinger, D.; Uda, M.; Sanna, S.; Cucca, F. A genome-wide association scan on the levels of markers of inflammation in Sardinians reveals associations that underpin its complex regulation. *PLoS Genet* **2012**, *8*, e1002480.
- [5] Rafiq, S.; Frayling, T.M.; Murray, A.; Hurst, A.; Stevens, K.; Weedon, M.N.; Henley, W.; Ferrucci, L.; Bandinelli, S.; Corsi, A.M.; Guralnik, J.M.; Melzer, D. A common variant of the interleukin 6 receptor (IL-6r) gene increases IL-6r and IL-6 levels, without other inflammatory effects. *Genes Immun* **2007**, *8*, 552-9.
- [6] Reich, D.; Patterson, N.; Ramesh, V.; De Jager, P.L.; McDonald, G.J.; Tandon, A.; et al. Myocardial Infarction Genetics and CARDIoGRAM Exome Consortia Investigators. Systematic Evaluation of Pleiotropy Identifies 6 Further Loci Associated With Coronary Artery Disease. *J Am Coll Cardiol*. 2017 Feb 21;69(7):823-836.
- [8] Christiansen, M.K.; Larsen, S.B.; Nyegaard, M.; Neergaard-Petersen, S.; Ajjan, R.; Würtz, M.; Grove, E.L.; Hvas, A.M.; Jensen, H.K.; Kristensen, S.D. Coronary artery disease-associated genetic variants and biomarkers of inflammation. *PLoS One* **2017**, *12*, e0180365.
- [9] Gigante, B.; Strawbridge, R.J.; Velasquez, I.M.; Golabkesh, Z.; Silveira, A.; Goel, A.; Baldassarre, D.; Veglia, F.; Tremoli, E.; Clarke, R.; Watkins, H.; Hamsten, A.; Humphries, S.E.; de Faire, U. Analysis of the role of interleukin 6 receptor haplotypes in the regulation of circulating levels of inflammatory biomarkers and risk of coronary heart disease. *PLoS One* **2015**, *10*, e0119980.
- [10] Webb, T.R.; Erdmann, J.; Stirrups, K.E.; Stitzel, N.O.; Masca, N.G.; Jansen, H.; et al. Myocardial Infarction Genetics and CARDIoGRAM Exome Consortia Investigators. Systematic Evaluation of Pleiotropy Identifies 6 Further Loci Associated With Coronary Artery Disease. *J Am Coll Cardiol* **2017**, *69*, 823-836.
